# Supplementary material for: Phytoconstituents and Ergosterol Biosynthesis-Targeting Antimicrobial Activity of Nutmeg (Myristica fragans Houtt.) against Phytopathogens
Source: MDPI journal article supplement (doi:10.3390/molecules29020471), 2024-01-18
Supplement: s1 [file s1]

# Phytoconstituents and Ergosterol Biosynthesis-Targeting Antimicrobial Activity of Nutmeg (*Myristica fragrans* Houtt.) against Phytopathogens

Adriana Cruz <sup>1,2</sup>, Eva Sánchez-Hernández <sup>3</sup>, Ana Teixeira <sup>1,4</sup>, Rui Oliveira <sup>1,2</sup>, Ana Cunha <sup>1,2</sup>, and Pablo Martín-Ramos <sup>3,\*</sup>

<sup>1</sup> Department of Biology, School of Sciences, University of Minho, Campus de Gualtar, 4710-057 Braga, Portugal; cruzadriana73@gmail.com (A.C.).

<sup>2</sup> Centre of Molecular and Environmental Biology (CBMA), University of Minho, Campus de Gualtar, 4710-057 Braga, Portugal; accunha@bio.uminho.pt (A.C.); ruipso@bio.uminho.pt (R.O.).

<sup>3</sup> Department of Agricultural and Forestry Engineering, ETSIIAA, Universidad de Valladolid, Avenida de Madrid 44, 34004 Palencia, Spain; eva.sanchez.hernandez@uva.es (E.S.-H.), pmr@uva.es (P.M.-R.).

<sup>4</sup> Centre for Research and Technology of Agro-Environmental and Biological Sciences (CITAB), Inov4Agro, University of Trás-os-Montes and Alto Douro (UTAD), Quinta de Prados, 5000-801 Vila Real, Portugal; anaspereirateixeira@gmail.com (A.T.).

\* Correspondence: pmr@uva.es

## SUPPLEMENTARY MATERIAL

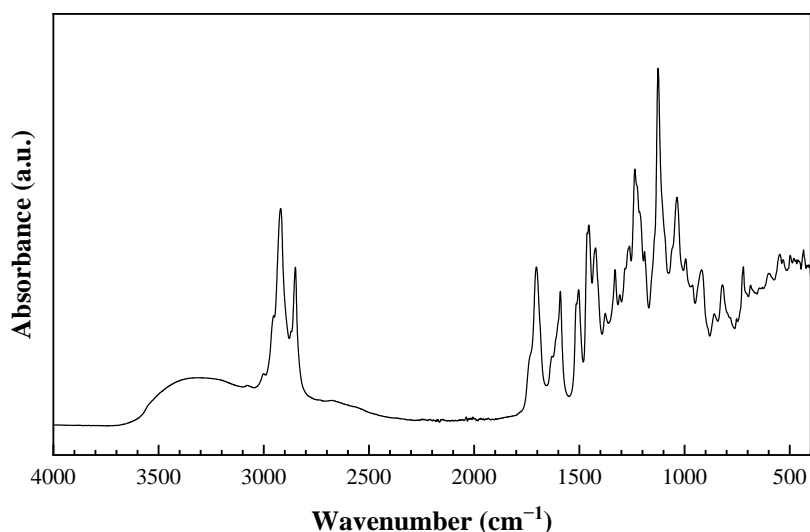

**Figure S1.** ATR–FTIR spectrum of the freeze-dried *M. fragrans* hydroethanolic extract

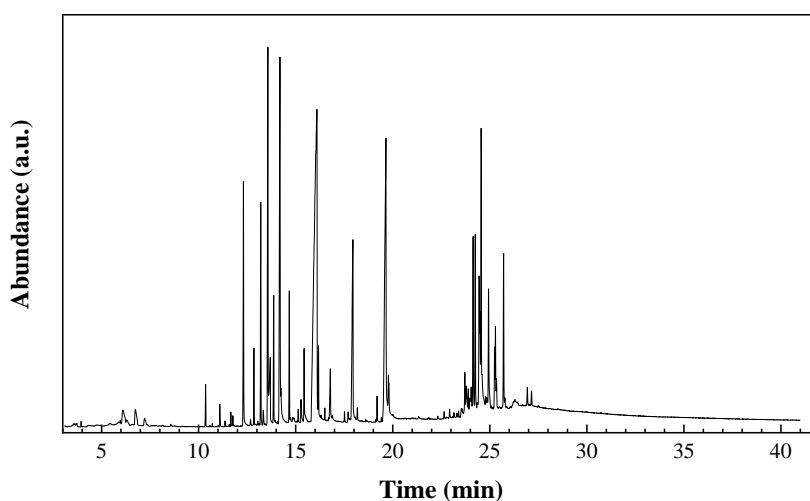

**Figure S2.** GC–MS chromatogram of *M. fragrans* hydroethanolic extract.
